# Supplementary material
Source: PubMed Central journal article supplement (PMC4623708)

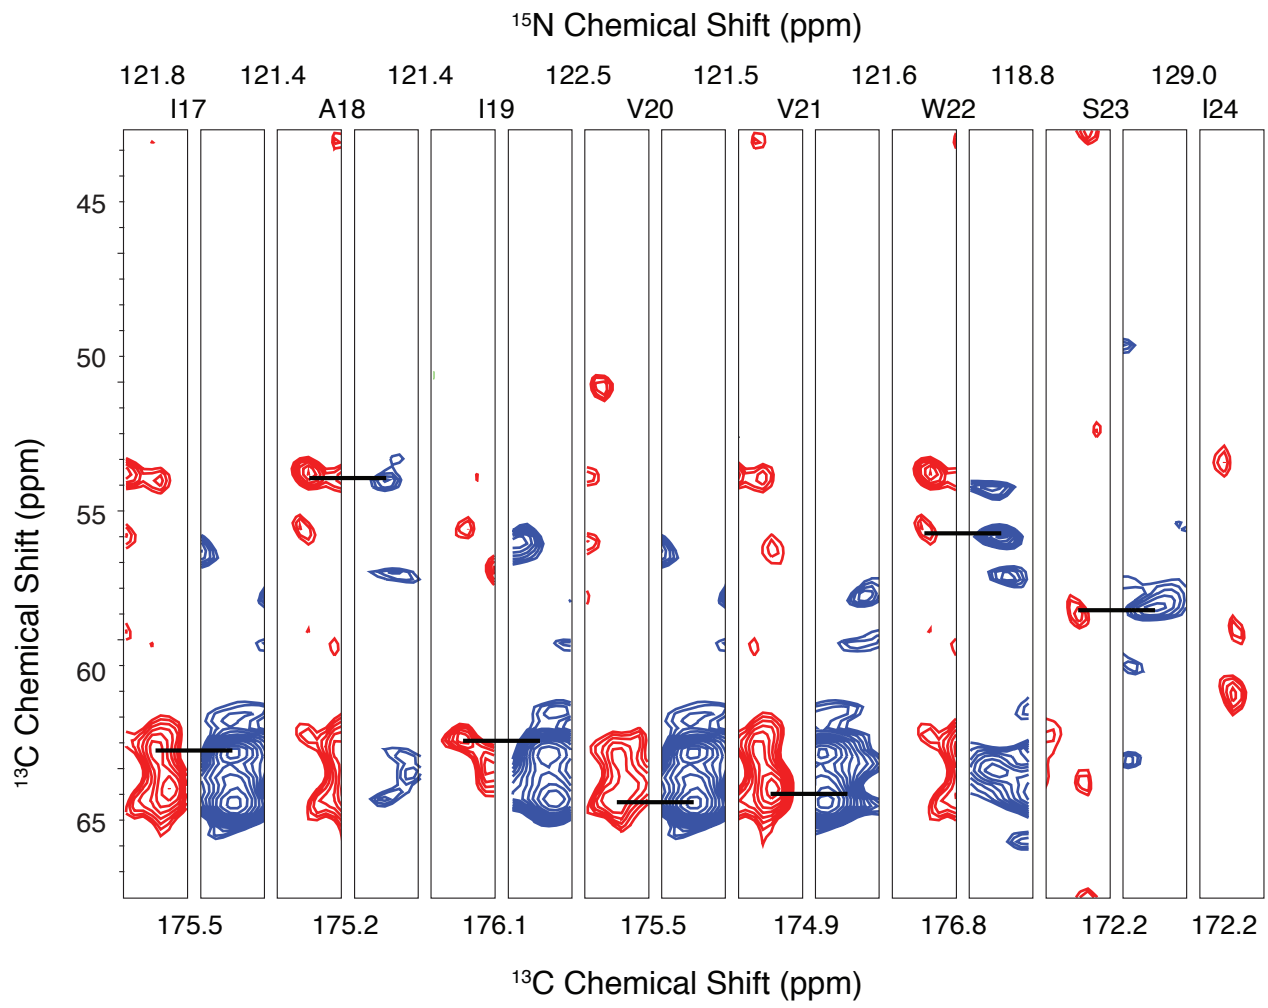

Supplement: NIHMS728940-supplement-1.pdf [file NIHMS728940-supplement-1.pdf]

A

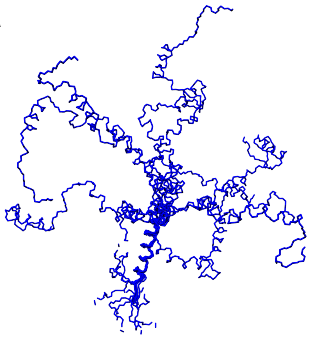

+ CS  
+ DC

B

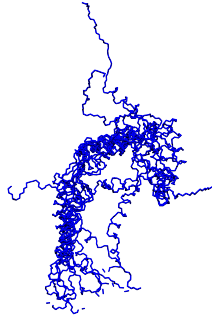

+ CS  
+ DC  
+ PRE: L41C MTSL

C

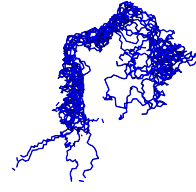

+ CS  
+ DC  
+ PRE: L41C MTSL  
+ PRE: MnEDTA

Supplement: NIHMS728940-supplement-2.pdf [file NIHMS728940-supplement-2.pdf]

A

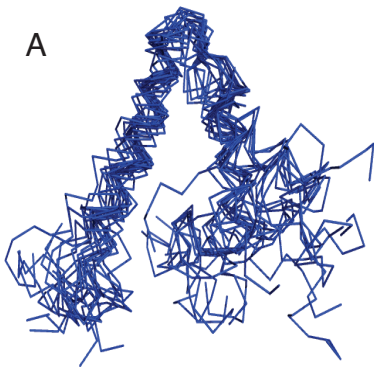

+ CS  
+ NOE

B

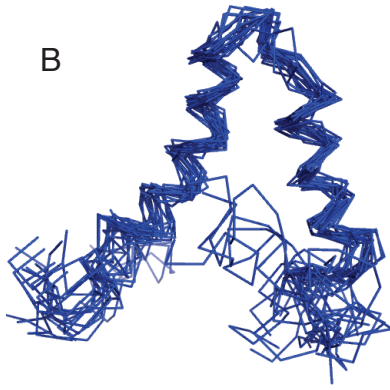

+ CS  
+ NOE  
+ PRE

C

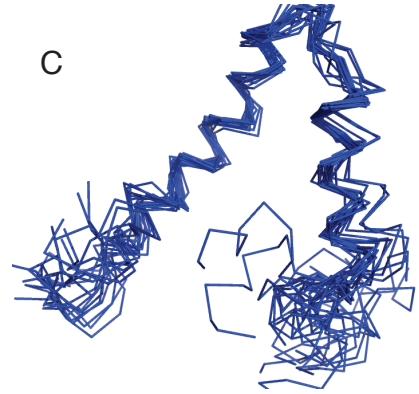

+ CS  
+ NOE  
+ PRE  
+ RDC

Supplement: NIHMS728940-supplement-3.pdf [file NIHMS728940-supplement-3.pdf]

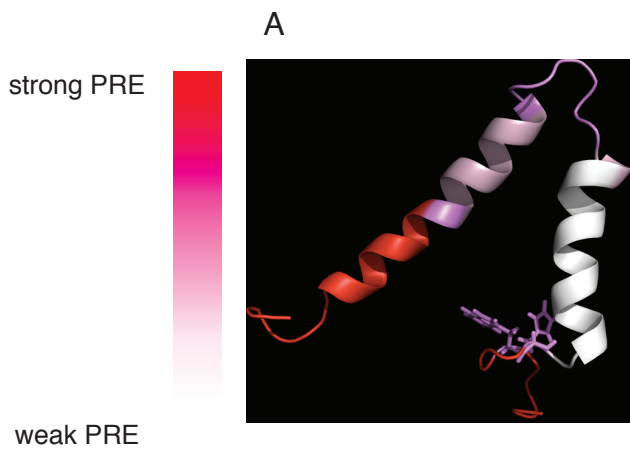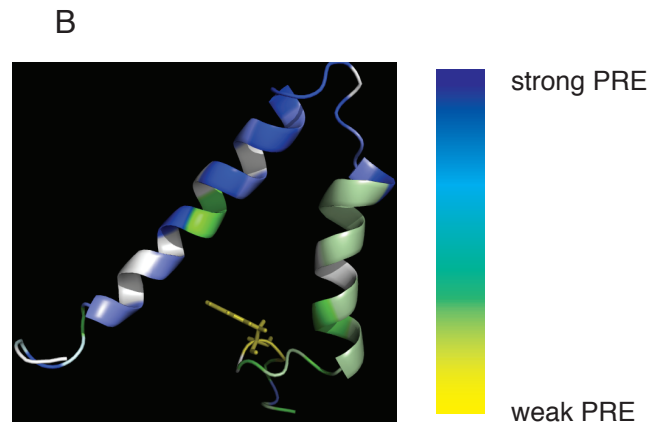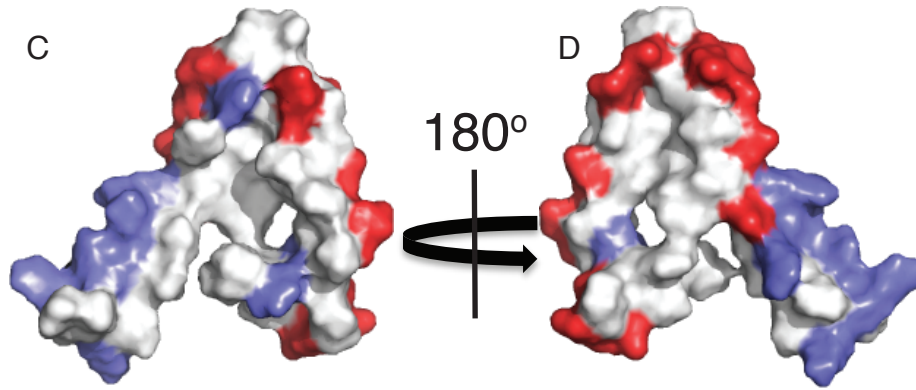

Supplement: NIHMS728940-supplement-4.pdf [file NIHMS728940-supplement-4.pdf]
